# Supplementary material
Source: PubMed Central journal article supplement (PMC1383511)
Supplement: 7600927s1.pdf [file 7600927s1.pdf]

## SUPPLEMENTARY INFORMATION

### **Results:**

#### **Characterization of the *gcrA* promoter**

To study *gcrA* transcriptional regulation, we needed to delineate the region of the *gcrA* promoter that is required for its activity. Because the +1 transcriptional start site was identified previously (Holtzendorff et al. 2004), we assayed transcriptional fusions of different fragments upstream of the +1 site of *gcrA* with a promoterless *lacZ* reporter gene on the low copy plasmid p*LacZ290* (Fig.3A). The construct containing the -100 to +92 region of the *gcrA* gene showed levels of  $\beta$ -galactosidase activity (3053 $\pm$ 65 Miller Units) similar to that of the construct containing the -507 to +92 region of the *gcrA* gene (3026 $\pm$ 74 Miller Units). The construct containing the -78 to +92 region of the *gcrA* gene showed levels of  $\beta$ -galactosidase activity (3308 $\pm$ 62 Miller Units) slightly higher (~10% higher) than the construct containing the -100 to +92 region of the *gcrA* gene, suggesting that the -100 to -78 region of the *gcrA* gene may contain a weak regulatory sequence. Interestingly, there is an inverted repeated sequence in this region (Fig.3A), which could putatively form a hairpin structure. Nevertheless, since this construct containing the -78 to +92 region of the *gcrA* gene showed levels of  $\beta$ -galactosidase activity quite similar to the other two larger constructs, we concluded that all significant regulatory sequences should be included in the -78 to +1 region of the *gcrA* promoter.

### **Material and methods:**

#### **Site-directed mutagenesis and truncation of the *gcrAP***

Oligos 5'-GGTAAGCTTTCAGCTCATTACCCGTCTC-3' (*gcrA\_rev*) and 5'-CCGGATCCGGAATCAACATCTTGTTTCT-3' were used to amplify *gcrAP*(-78...+92) and the corresponding PCR product was digested with BamHI and HindIII and cloned into p*LacZ290*, giving rise to p*LacZ290-gcrAP*(WT). Oligos *gcrA\_rev* and 5'-CCGGATCCTTTTCGCAAGCGCGGGCTTG-3' were used to amplify *gcrAP*(-100...+92) and the corresponding PCR product was cloned into BamHI-HindIII-digested p*LacZ290*, giving rise to p*LacZ290-gcrAP*(WT).

Site-directed mutations in the CtrA binding site, the two methylation sites and the DnaA box were generated by PCR using the flanking oligos *gcrA\_rev* and 5'-CCGGATCCCTGTTCCAGCGCCGATAG-3' (*gcrA\_fwd*). *gcrAP*(CtrAL) was created

using the mutagenic oligos 5`-CCATTGTGCGTTCCGCCGCATTCTTTACG-3` and 5`-CGTAAAGAATGCGGCGGAACGCACAATGG-3`. *gcrAP*(CtrAM) was created using the mutagenic oligos 5`-TGC GTTTTAACGCAGGCTTTACGATATCTA-3` and 5`-TAGATATCGTAAAGCCTGCGTTAAAACGCA-3`. *gcrAP*(CtrAR) was created using the mutagenic oligos 5`-TTTTAACGCATTCTCTACGATATCTAGTA-3` and 5`-TACTAGATATCGTAGAGAATGCGTTAAAA-3`. *gcrAP*(UM) was created using the mutagenic oligos 5`-CTGTGGACAGAGTTGATGGCGCCCAT-3` , 5`-AATGGGCGCCATCAACTCTGTCCACAG-3` , 5`-GGCTTGCCGGAATTAACATCTTGTTTC-3` and 5`-GAAACAAGATGTTAATTCCGGCAAGCC-3`. *gcrAP*(DnaA) was created using the mutagenic oligos 5`-AACATCTTGTTTCCACGGACAGAGTCGAT-3` and 5`-ATCGACTCTGTCCGTGGAAACAAGATGTT-3`. *gcrAP*(DnaA+CtrAL) was created using the mutagenic oligos used to construct *gcrAP*(DnaA) and *gcrAP*(CtrAL) DNA template. Final mutagenized PCR products were digested by BamHI and HindIII, and cloned into *pLacZ290*, giving rise to *pLacZ290-gcrAP*(CtrAL), *pLacZ290-gcrAP*(CtrAM), *pLacZ290-gcrAP*(CtrAR), *pLacZ290-gcrAP*(UM), *pLacZ290-gcrAP*(DnaA) and *pLacZ290-gcrAP*(DnaA+CtrAL).

#### **Cell cycle transcription and synthesis analysis:**

1-ml aliquots of cells grown in M2G were removed and labeled with 10 $\mu$ Ci of [ $S^{35}$ ] methionine (Amersham) for 2 or 5 minutes. Cells were collected by centrifugation and frozen on dry ice. Cell pellets were resuspended in 50  $\mu$ l of SDS buffer and boiled for 5 minutes to lyse cells. Cell lysates were then mixed with 0.8 ml of RIPA buffer or Wash buffer, and 20  $\mu$ l of protein A-agarose (Roche) was incubated with each sample for 1 hour to precipitate proteins that bind non-specifically. Equivalent counts of radiolabelled proteins were then used for immunoprecipitation. Anti-GcrA and anti- $\beta$  galactosidase (Abcam) serums were diluted 1:200 and 1:1000 respectively into samples. Samples were incubated 1 hour before adding 20  $\mu$ l of protein A-agarose, and incubated for 1 hour again. All incubations were performed at room temperature. Immunoprecipitates were collected by centrifugation, washed 3 times with Wash or RIPA buffer, resuspended in 20  $\mu$ l of SDS-PAGE sample buffer, and boiled for 5 minutes. Resulting samples were resolved by 8% or 10% SDS-PAGE for  $\beta$ -Galactosidase or 15% SDS-PAGE for GcrA. Gels were dried and exposed against a Phosphor Screen

(Molecular Dynamics). Labelled protein bands were scanned and quantified using a PhosphorImager with ImageQuant software (Molecular Dynamics) and their relative activity was normalized so that the maximum value equals 1.

Buffers composition:

SDS buffer: 10 mM Tris-HCl pH 8, 1% SDS, 1 mM EDTA

RIPA buffer: 50 mM Tris-HCl pH 8, 150 mM NaCl, 1 mM EDTA, 1% Nonidet P-40, 0.5% deoxycholic acid, 0.1% SDS

Wash buffer: 50 mM Tris-HCl pH 8, 150 mM NaCl, 0.5% Triton X-100

### **GcrA half-life determination**

Data fitting using time points from three independent experiments was performed with Kaleida Graph 3.5 (Synergy Software), using an exponential decay model. The fraction of residual protein is given by  $\exp(-t/\tau)$ , where  $t$  is the time after the reference time point,  $t_0$ , and the sole free parameter,  $\tau$ , is the characteristic decay time. This expression yields the half-life of the protein,  $\tau_{1/2}$ , through the relation  $\tau_{1/2} = \tau \ln 2$ .
